# Supplementary material
Source: PubMed Central journal article supplement (PMC1523238)

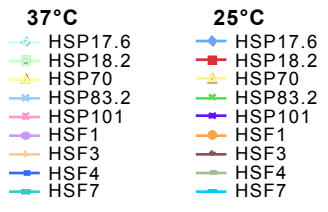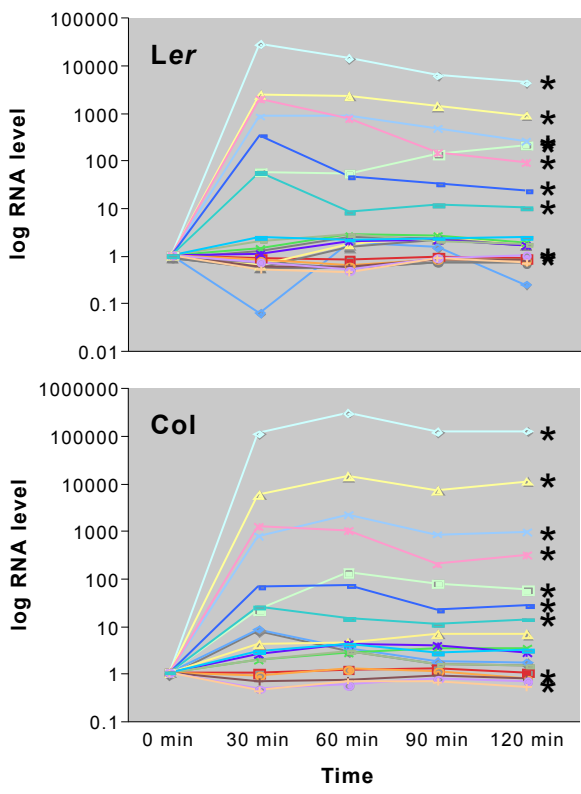

Supplement: pgen.0020106.sg002.pdf [file pgen.0020106.sg002.pdf]
